# Supplementary material for: Usual Intake of Micronutrients and Prevalence of Inadequate Intake among Chinese Adults: Data from CNHS 2015–2017
Source: MDPI journal article supplement (doi:10.3390/nu14224714), 2022-11-08
Supplement: s1 [file s1]

**Table S1.** EARs or AIs for selected micronutrients for Chinese adults based on DRIs (2013).

| Age group | EAR               |                |                  |                    |                      |                     |                        |                     |                    |                      |                  | AI                  |                  |                     |                     |
|-----------|-------------------|----------------|------------------|--------------------|----------------------|---------------------|------------------------|---------------------|--------------------|----------------------|------------------|---------------------|------------------|---------------------|---------------------|
|           | Calcium<br>(mg/d) | Iron<br>(mg/d) | Copper<br>(mg/d) | Selenium<br>(µg/d) | Phosphorus<br>(mg/d) | Magnesium<br>(mg/d) | Vitamin A<br>(µgRAE/d) | Vitamin C<br>(mg/d) | Thiamine<br>(mg/d) | Riboflavin<br>(mg/d) | Niacin<br>(mg/d) | Manganese<br>(mg/d) | Sodium<br>(mg/d) | Potassium<br>(mg/d) | Vitamin E<br>(mg/d) |
| Male      |                   |                |                  |                    |                      |                     |                        |                     |                    |                      |                  |                     |                  |                     |                     |
| 18~49     | 650               | 9              | 0.6              | 50                 | 600                  | 280                 | 560                    | 85                  | 1.2                | 1.2                  | 12               | 4.5                 | 1500             | 2000                | 14                  |
| 50~64     | 800               | 9              | 0.6              | 50                 | 600                  | 280                 | 560                    | 85                  | 1.2                | 1.2                  | 12               | 4.5                 | 1400             | 2000                | 14                  |
| 65~79     | 800               | 9              | 0.6              | 50                 | 590                  | 270                 | 560                    | 85                  | 1.2                | 1.2                  | 11               | 4.5                 | 1400             | 2000                | 14                  |
| 80~       | 800               | 9              | 0.6              | 50                 | 560                  | 260                 | 560                    | 85                  | 1.2                | 1.2                  | 11               | 4.5                 | 1300             | 2000                | 14                  |
| Female    |                   |                |                  |                    |                      |                     |                        |                     |                    |                      |                  |                     |                  |                     |                     |
| 18~49     | 650               | 15             | 0.6              | 50                 | 600                  | 280                 | 480                    | 85                  | 1.0                | 1.0                  | 10               | 4.5                 | 1500             | 2000                | 14                  |
| 50~64     | 800               | 9              | 0.6              | 50                 | 600                  | 280                 | 480                    | 85                  | 1.0                | 1.0                  | 10               | 4.5                 | 1400             | 2000                | 14                  |
| 65~79     | 800               | 9              | 0.6              | 50                 | 590                  | 270                 | 480                    | 85                  | 1.0                | 1.0                  | 9                | 4.5                 | 1400             | 2000                | 14                  |
| 80~       | 800               | 9              | 0.6              | 50                 | 560                  | 260                 | 480                    | 85                  | 1.0                | 1.0                  | 8                | 4.5                 | 1300             | 2000                | 14                  |

DRIs— Chinese Dietary Reference Intakes; EAR— Estimated Average Requirement; AI— Adequate Intake.
